# Supplementary material for: Synaptic vesicle proteins are selectively delivered to axons in mammalian neurons
Source: eLife. 2023 Feb 2;12:e82568. doi: 10.7554/eLife.82568 (PMC9894587; doi:10.7554/eLife.82568)
Supplement: Source data 1. [file elife-82568-data1.zip]

Archive with 16 entries (13 files):
- Source Data files/Raw blot images/
- Source Data files/Raw blot images/Figure 3 - figure supplement 1/
- Source Data files/Raw blot images/Figure 3 - figure supplement 1/Figure 3 - figure supplement 1A anti-SYT1 Ladder.jpg
- Source Data files/Raw blot images/Figure 3 - figure supplement 1/Figure 3 - figure supplement 1A anti-SYT1.tif
- Source Data files/Raw blot images/Figure 3 - figure supplement 1/Figure 3 - figure supplement 1A TCE loading control.jpg
- Source Data files/Raw blot images/Figure 3 - figure supplement 1/Figure 3 - figure supplement 1B anti-SYB2 Ladder.jpg
- Source Data files/Raw blot images/Figure 3 - figure supplement 1/Figure 3 - figure supplement 1B anti-SYB2.tif
- Source Data files/Raw blot images/Figure 3 - figure supplement 1/Figure 3 - figure supplement 1B TCE loading control.jpg
- Source Data files/Raw blot images/Figure 3 - figure supplement 1/Thumbs.db
- Source Data files/Raw blot images/Figure 5/
- Source Data files/Raw blot images/Figure 5/Figure 5d anti-SYB2.gif
- Source Data files/Raw blot images/Figure 5/Figure 5d anti-SYP.gif
- Source Data files/Raw blot images/Figure 5/Figure 5d anti-SYT1.gif
- Source Data files/Raw blot images/Figure 5/Figure 5d TCE load ctrl.gif
- Source Data files/Raw blot images/Figure 5/Thumbs.db
- Source Data files/uncropped blots with labels.pdf
