# Supplementary figures and images for: Synaptic vesicle proteins are selectively delivered to axons in mammalian neurons
Source: eLife journal article supplement (doi:10.7554/elife.82568), 2023-01-12

Figure 5D

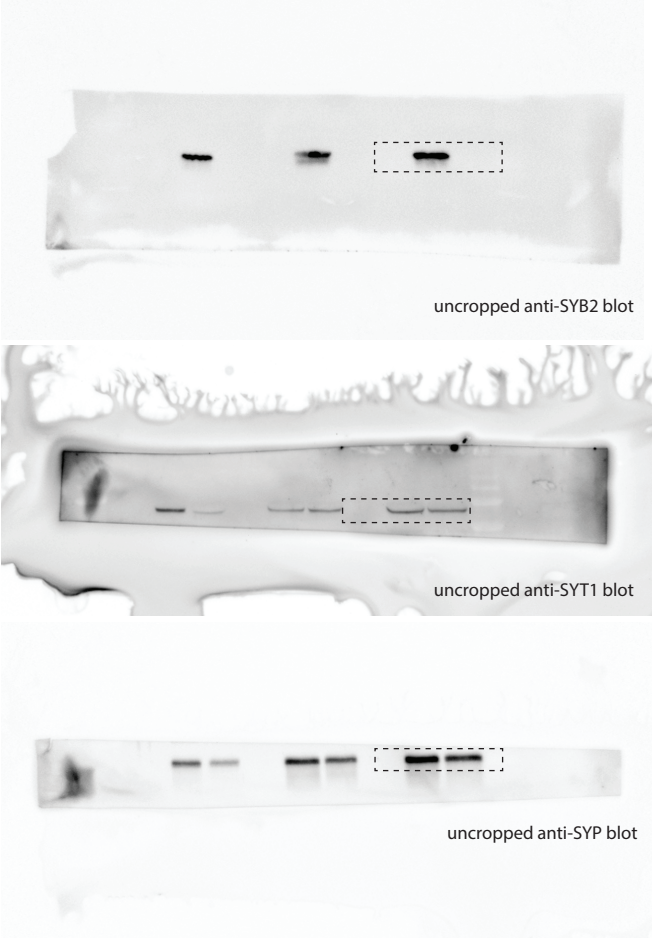

Figure 3 - figure supplement 1A

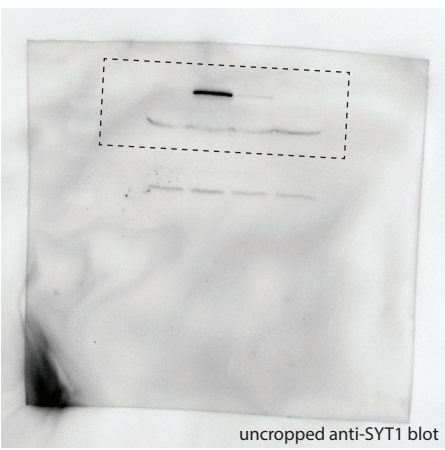

Figure 3 - figure supplement 1B

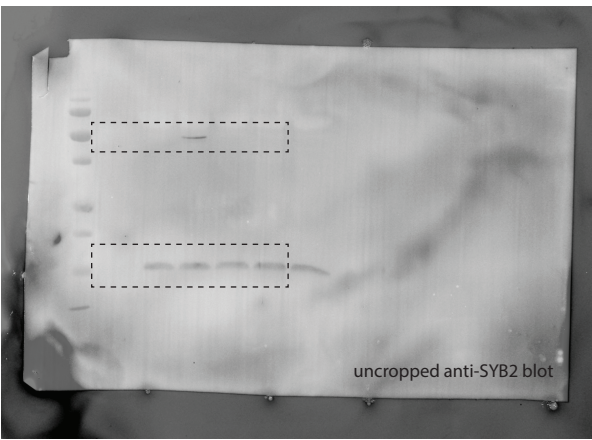

Supplement: data1 [file elife-82568-data1-v1.zip]
